# Supplementary material for: Construction of kagome-type networks via tridentate ligand: structural properties as alcohol reservoir
Source: Royal Society of Chemistry journal article supplement (doi:10.1039/c2ce26531a), 2012-11-01
Supplement: c2ce26531a.pdf [file c2ce26531a.pdf]

<Electronic Supplementary Information>

## **Construction of kagome-type networks via tridentate ligand: structural properties as alcohol reservoir**

Haeri Lee, Tae Hwan Noh and Ok-Sang Jung\*

*Department of Chemistry, Pusan National University, Pusan 609-735, Korea*

### **Experimental**

**Materials and Measurements.** All chemicals including CuCl<sub>2</sub> and CuBr<sub>2</sub> were purchased from Aldrich, and used as received. Elemental microanalyses (C, H, N) were performed on crystalline samples by the KBSI Pusan Center using a Vario-EL III analyzer. Thermal analyses were performed under N<sub>2</sub> at a scan rate of 10 °C/min using a Labsys TGA-DSC 1600. Infrared spectra were obtained on a Nicolet 380 FT-IR spectrophotometer using samples prepared as KBr pellets. X-ray powder diffraction data were recorded on a Rigaku RINT/DMAX-2500 diffractometer at 40 kV, 126 mA for Cu K $\alpha$ . <sup>1</sup>H NMR spectra were recorded on a Varian Mercury Plus 300. SEM images were taken by a VEGA 3 SEM TESCAN. Calcination of crystals was performed using a Daeheung Muffle Furnace DF-1.

### **Preparation of *N,N',N''*-Tris(2-pyridinylethyl)-1,3,5-benzenetricarboxamide (L).**

Triethylamine (2.30 mL, 16.5 mmol) was slowly added to a 100 mL chloroform solution of 2-(2-pyridinyl)ethanamine (1.97 mL, 16.5 mmol) maintained at an ice-bath temperature. Then, an equivalent amount of 1,3,5-benzenetricarbonyl trichloride (1.35 g, 5.0 mmol) was added and refluxed for 36 h. The solution was washed with water several times, and then dried with MgSO<sub>4</sub>. Removal of the solvent *N,N',N''*-tris(2-pyridinylethyl)-1,3,5-

benzenetricarboxamide (L) afforded a pale yellow solid in a 77% yield (2.02 g). Anal. Calcd for  $C_{30}H_{30}N_6O_3$ : C, 68.95; H, 5.79; N, 16.08%. Found: C, 68.80; H, 5.72; N, 16.14%. IR (KBr,  $cm^{-1}$ ): 3238 (m), 3064 (m), 2935 (w), 1656 (s), 1592 (m), 1533 (s), 1477 (m), 1438 (m), 1292 (s), 765(m).  $^1H$  NMR ( $Me_2SO-d_6$ ,  $\delta$ ): 8.81 (s, 3H), 8.51 (d,  $J = 4.94$  Hz, 3H), 8.36 (s, 3H), 7.71 (t,  $J = 7.42$  Hz, 3H), 7.29 (d,  $J = 7.69$  Hz, 3H), 7.23 (dd,  $J = 7.42$  Hz,  $J = 4.94$  Hz, 3H), 3.65 (m, 6H), 3.02 (t,  $J = 7.69$  Hz, 6H).  $^{13}C$  NMR (75 MHz,  $CD_3OD$ ,  $\delta$ ): 168.34, 160.15, 149.80, 138.66, 137.52, 129.78, 125.03, 123.18, 41.07, 38.22.  $^{13}C$  NMR (75 MHz,  $Me_2SO-d_6$ ,  $\delta$ ): 165.65, 159.18, 149.17, 136.57, 135.17, 128.53, 123.22, 121.63, 39.50, 37.34.

**Synthesis of  $6EtOH@[Cu_3Cl_6L_2]$ .** A methanol solution (10 mL) of  $CuCl_2$  (40.3 mg, 0.3 mmol) was slowly added to an ethanol solution (10 mL) of L (105 mg, 0.2 mmol). The mixture was gradually evaporated, resulting, after 3 days in an 84.0% (145 mg) yield of blue crystals suitable for X-ray crystallography. m.p. 332 °C (dec. of skeleton). Anal. Calcd for  $C_{72}H_{93}N_{12}O_{12}Cu_3Cl_6$ : C, 50.22; H, 5.44; N, 9.76%. Found: C, 50.10; H, 5.37; N, 9.81%. IR (KBr,  $cm^{-1}$ ): 3305 (m), 3070 (m), 2937 (w), 1654 (s), 1606 (s), 1540 (s), 1488 (m), 1438 (m), 1290 (m), 769 (m).

**Synthesis of  $3MeOH\cdot 3EtOH@[Cu_3Br_6L_2]$ .**  $3MeOH\cdot 3EtOH@[Cu_3Br_6L_2]$  was prepared in the same manner as  $6EtOH@[Cu_3Cl_6L_2]$ , using  $CuBr_2$  instead of  $CuCl_2$ , for a 78.6% (153 mg) yield. m.p. 338 °C (dec. of skeleton). Anal. Calcd for  $C_{69}H_{90}N_{12}O_{12}Cu_3Br_6$ : C, 42.51; H, 4.65; N, 8.62%. Found: C, 42.50; H, 4.62; N, 8.86%. IR (KBr,  $cm^{-1}$ ): 3288 (m), 3066 (m), 2939 (w), 1646 (s), 1606 (m), 1540 (s), 1488 (m), 1438 (m), 1292 (m), 769 (m).

**Crystallographic Structure Determination.** All X-ray data were collected on a Bruker SMART automatic diffractometer with graphite-monochromated Mo  $K\alpha$  radiation ( $\lambda = 0.71073$  Å) and a CCD detector at 170 K. The cell parameters and orientation matrix were obtained by means of the collection and processing of 36 frames of 2D diffraction images. The data were corrected for Lorentz and polarization effects. The absorption effects were

corrected by the multi-scan method (SADABS).<sup>1</sup> The structures were solved by the direct method (SHELXS 97) and refined by full-matrix least-squares techniques (SHELXL 97).<sup>2</sup> The non-hydrogen atoms were refined anisotropically, and the hydrogen atoms were placed in calculated positions and refined using a riding model. The crystal parameters along with procedural information on the data collection and structure refinement are listed in Table S1.

## References

- 1 G. M. Sheldrick, SADABS, A program for Empirical Absorption Correction of Srea Detector Data; University of Göttingen, Germany, 1996.
- 2 G. M. Sheldrick, SHELXS-97: A Program for Structure Determination; University of Göttingen, Germany, 1997; G. M. Sheldrick, SHELXL-97: A Program for Structure Refinement; University of Göttingen, Germany, 1997.

**Table S1.** Crystal data for 6EtOH@[Cu<sub>3</sub>Cl<sub>6</sub>L<sub>2</sub>] and 3MeOH·3EtOH@[Cu<sub>3</sub>Br<sub>6</sub>L<sub>2</sub>]

|                                                                 | 6EtOH@[Cu <sub>3</sub> Cl <sub>6</sub> L <sub>2</sub> ]                                         | 3MeOH·3EtOH@[Cu <sub>3</sub> Br <sub>6</sub> L <sub>2</sub> ]                                   |
|-----------------------------------------------------------------|-------------------------------------------------------------------------------------------------|-------------------------------------------------------------------------------------------------|
| Formula                                                         | C <sub>72</sub> H <sub>96</sub> N <sub>12</sub> O <sub>12</sub> Cu <sub>3</sub> Cl <sub>6</sub> | C <sub>69</sub> H <sub>90</sub> N <sub>12</sub> O <sub>12</sub> Cu <sub>3</sub> Br <sub>6</sub> |
| <i>M<sub>w</sub></i> (g mol <sup>-1</sup> )                     | 1724.94                                                                                         | 1949.61                                                                                         |
| Crystal system                                                  | Trigonal                                                                                        | Trigonal                                                                                        |
| Space group                                                     | <i>R</i> 3                                                                                      | <i>R</i> 3                                                                                      |
| <i>a</i> (Å)                                                    | 25.1719(5)                                                                                      | 25.4049(3)                                                                                      |
| <i>c</i> (Å)                                                    | 10.8188(3)                                                                                      | 10.6802(2)                                                                                      |
| <i>V</i> (Å <sup>3</sup> )                                      | 5936.7(2)                                                                                       | 5969.5(2)                                                                                       |
| <i>Z</i>                                                        | 3                                                                                               | 3                                                                                               |
| <i>d</i> <sub>calcd</sub> (Mg m <sup>-3</sup> )                 | 1.447                                                                                           | 1.627                                                                                           |
| Reflections                                                     | 11925                                                                                           | 11714                                                                                           |
| <i>R</i> <sub>int</sub>                                         | 0.0655                                                                                          | 0.0942                                                                                          |
| <i>μ</i> (mm <sup>-1</sup> )                                    | 1.067                                                                                           | 3.870                                                                                           |
| GoF on <i>F</i> <sup>2</sup>                                    | 1.089                                                                                           | 1.026                                                                                           |
| <i>R</i> <sub>1</sub> [ <i>I</i> > 2σ( <i>I</i> )] <sup>a</sup> | 0.0406                                                                                          | 0.0590                                                                                          |
| <i>wR</i> <sub>2</sub> (all data) <sup>b</sup>                  | 0.0686                                                                                          | 0.1371                                                                                          |

<sup>a</sup> $R_1 = \frac{\sum ||F_o| - |F_c||}{\sum |F_o|}$ , <sup>b</sup> $wR_2 = \frac{(\sum [w(F_o^2 - F_c^2)^2])}{\sum [w(F_o^2)^2]}^{1/2}$

**Table S2.** Selected bond lengths (Å) and angles (°) for 6EtOH@[Cu<sub>3</sub>Cl<sub>6</sub>L<sub>2</sub>] and  
3MeOH·3EtOH@[Cu<sub>3</sub>Br<sub>6</sub>L<sub>2</sub>]

|                  | 6EtOH@[Cu <sub>3</sub> Cl <sub>6</sub> L <sub>2</sub> ] | 3MeOH·3EtOH@[Cu <sub>3</sub> Br <sub>6</sub> L <sub>2</sub> ] |
|------------------|---------------------------------------------------------|---------------------------------------------------------------|
| Cu(1)–N(1)       | 2.000(4)                                                | 1.989(6)                                                      |
| Cu(1)–N(3)       | 2.005(4)                                                | 2.000(7)                                                      |
| Cu(1)–X(1)       | 2.261(2)                                                | 2.456(2)                                                      |
| Cu(1)–X(2)       | 2.283(2)                                                | 2.416(2)                                                      |
| Cu(1)···O(2)     | 2.99(2)                                                 | 2.99(1)                                                       |
| Cu···Cu          | 11.352(1)                                               | 11.525(2)                                                     |
|                  | 13.820(1)                                               | 13.879(2)                                                     |
| diagonal Cu···Cu | 25.172(1)                                               | 25.405(1)                                                     |
| plane···plane    | 3.606(1)                                                | 3.560(1)                                                      |
| N(1)–Cu(1)–N(3)  | 162.6(2)                                                | 163.6(3)                                                      |
| X(1)–Cu(1)–X(2)  | 175.51(7)                                               | 174.46(6)                                                     |
| N(1)–Cu(1)–X(1)  | 90.6(1)                                                 | 88.0(2)                                                       |
| N(3)–Cu(1)–X(1)  | 92.4(1)                                                 | 91.7(2)                                                       |

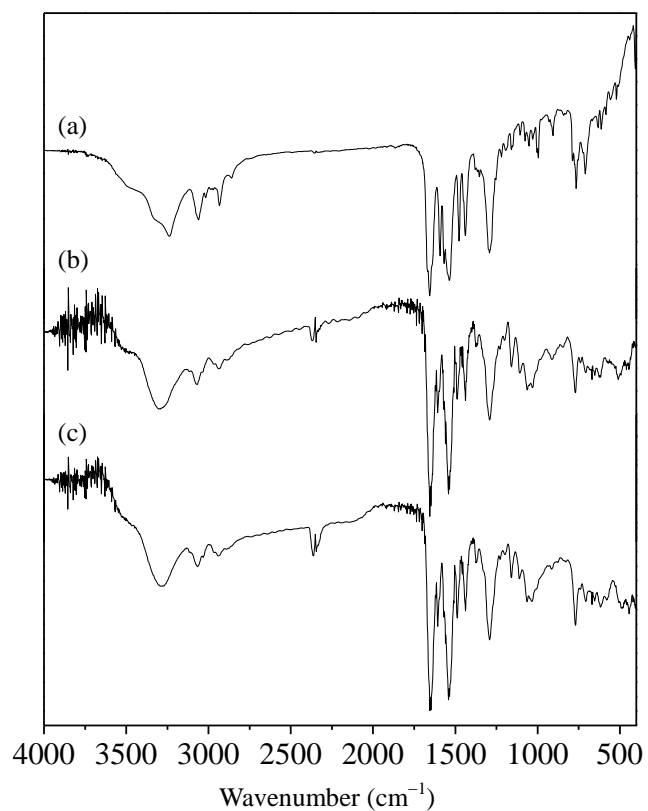

**Fig. S1.** IR data of L (a), 6EtOH@[Cu<sub>3</sub>Cl<sub>6</sub>L<sub>2</sub>] (b), and 3MeOH·3EtOH@[Cu<sub>3</sub>Br<sub>6</sub>L<sub>2</sub>] (c).

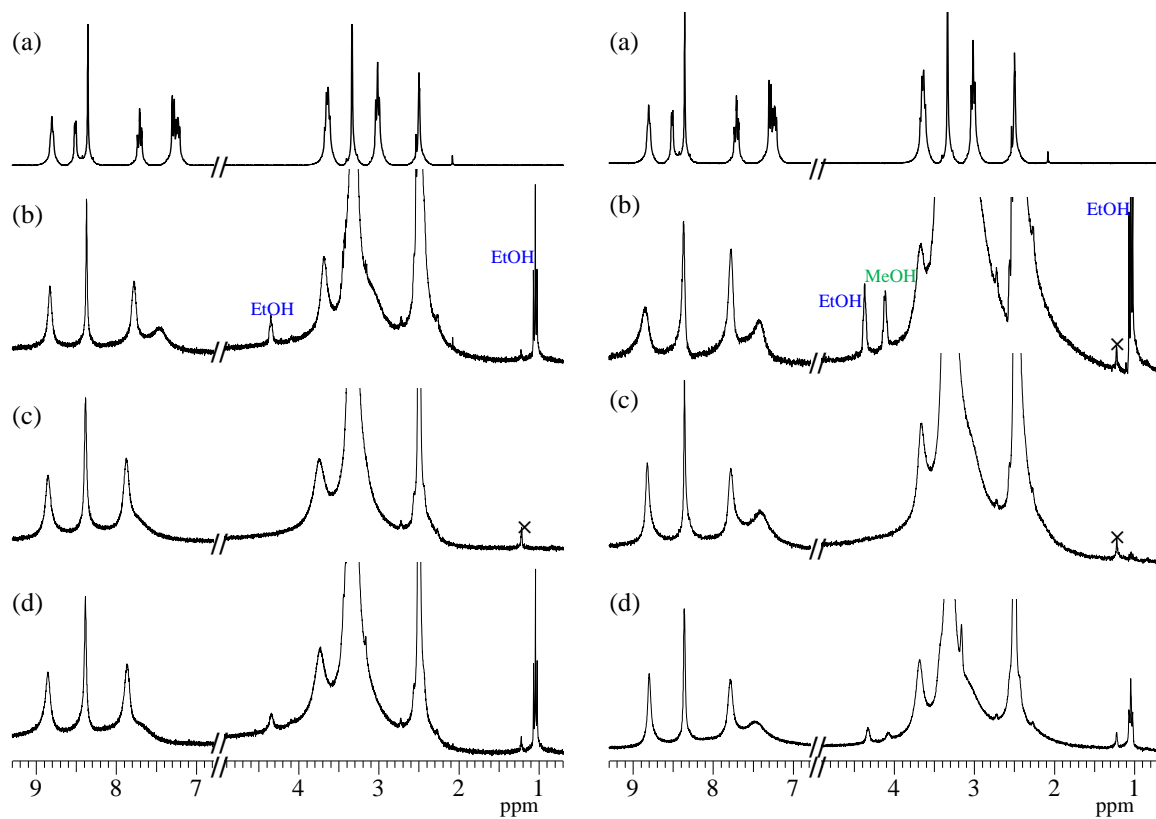

**Fig. S2.**  $^1\text{H}$  NMR spectra ( $\text{DMSO-}d_6$ ) during the evacuation of re-absorption of the solvated molecules into  $[\text{Cu}_3\text{X}_6\text{L}_2]$ . Left: L (a),  $6\text{EtOH}@[\text{Cu}_3\text{Cl}_6\text{L}_2]$  (b), evacuated sample at  $80\text{ }^\circ\text{C}$  overnight (c), and re-absorbed sample (d); right: L (a),  $3\text{MeOH}\cdot 3\text{EtOH}@[\text{Cu}_3\text{Br}_6\text{L}_2]$  (b), evacuated sample at  $80\text{ }^\circ\text{C}$  overnight (c), and re-absorbed sample (d).

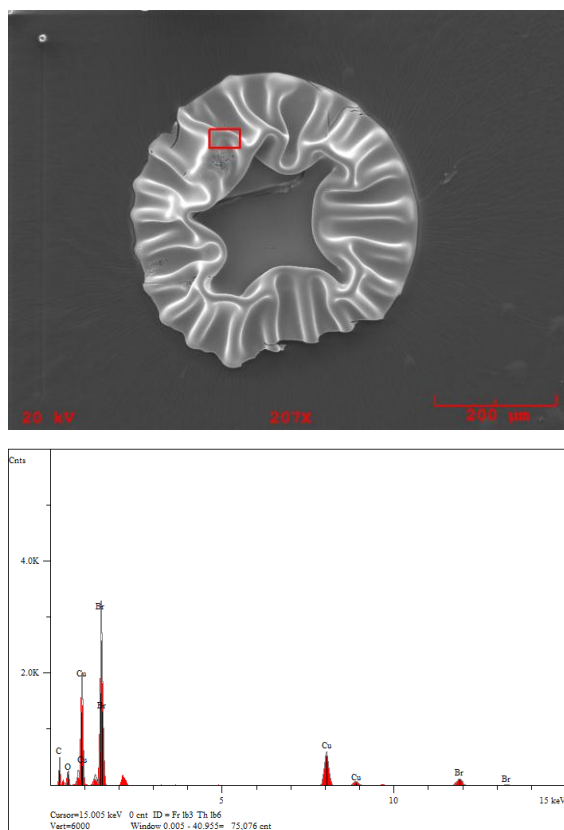

| Elt. | Line       | Atomic % | Conc.   | Units |       |
|------|------------|----------|---------|-------|-------|
| C    | K $\alpha$ | 60.863   | 23.882  | wt. % |       |
| O    | K $\alpha$ | 9.284    | 4.853   | wt. % |       |
| Cu   | K $\alpha$ | 12.468   | 25.884  | wt. % |       |
| Br   | K $\alpha$ | 17.385   | 45.381  | wt. % |       |
|      |            | 100.000  | 100.000 | wt. % | Total |

**Fig. S3.** SEM EDX data for 3MeOH·3EtOH@[Cu<sub>3</sub>Br<sub>6</sub>L<sub>2</sub>] after calcination at 350 °C for 1 h.



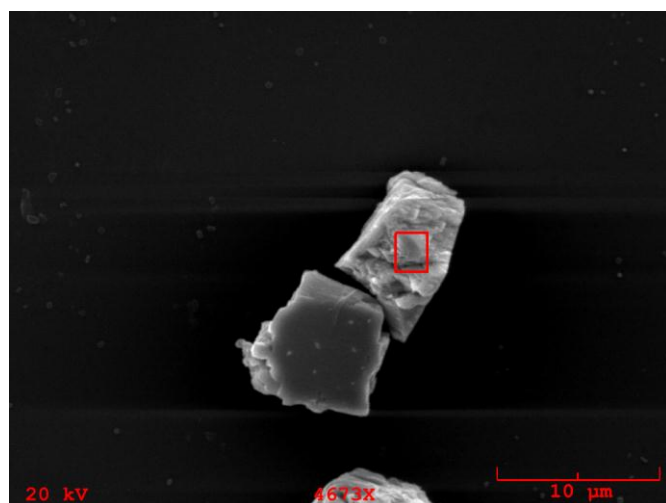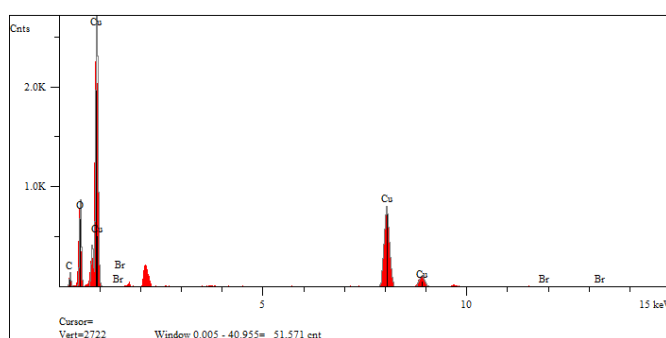

| Elt. | Line       | Atomic %      | Conc    | Units |       |
|------|------------|---------------|---------|-------|-------|
| C    | K $\alpha$ | 26.111        | 9.615   | wt.%  |       |
| O    | K $\alpha$ | <b>36.929</b> | 18.114  | wt.%  |       |
| Cu   | K $\alpha$ | <b>36.429</b> | 70.972  | wt.%  |       |
| Br   | K $\alpha$ | 0.530         | 1.298   | wt.%  |       |
|      |            | 100.000       | 100.000 | wt.%  | Total |

**Fig. S4.** SEM EDX data for CuO after calcination of 3MeOH·3EtOH@[Cu<sub>3</sub>Br<sub>6</sub>L<sub>2</sub>] at 600 °C for 1 h.

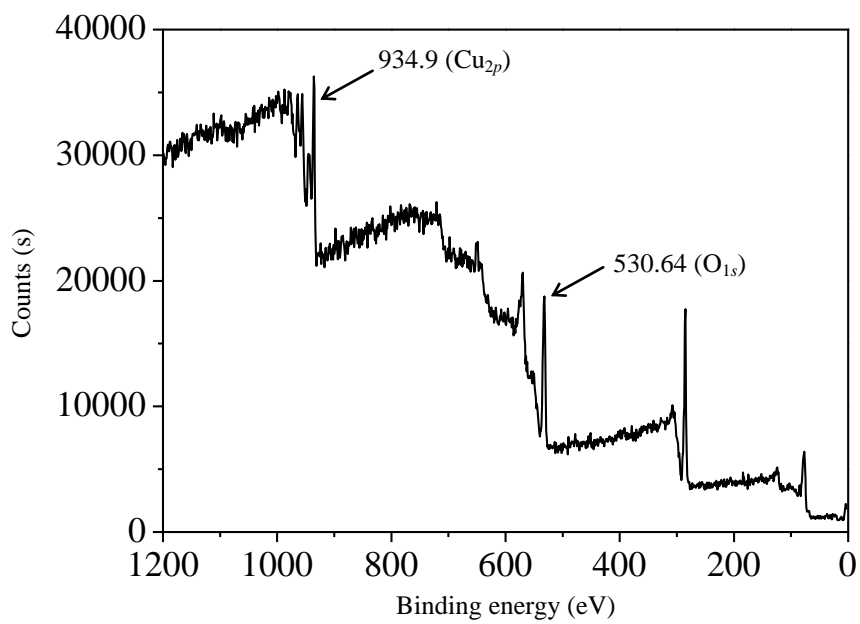

**Fig. S5.** XPS data of CuO nanocrystals after calcination of 3MeOH·3EtOH@[Cu<sub>3</sub>Br<sub>6</sub>L<sub>2</sub>] at 600 °C for 1 h.
